# Supplementary material for: Topological patterns in microRNA–gene regulatory network: studies in colorectal and breast cancer
Source: Royal Society of Chemistry journal article supplement (doi:10.1039/c3mb25518b), 2013-02-13
Supplement: c3mb25518b.pdf [file c3mb25518b.pdf]

## *Supplementary Information*

# Topological patterns in microRNA-Gene regulatory network: Studies in colorectal and breast cancer

Debarka Sengupta and Sanghamitra Bandyopadhyay\*

February 11, 2013

Machine Intelligence Unit, Indian Statistical Institute, Kolkata, India.

\* Corresponding Author: Sanghamitra Bandyopadhyay, email: sanghami@isical.ac.in

## Contents

|                                                                      |          |
|----------------------------------------------------------------------|----------|
| <b>1 Terminologies Related to Network Topology</b>                   | <b>2</b> |
| 1.1 Density . . . . .                                                | 2        |
| 1.2 Betweenness centrality of nodes . . . . .                        | 2        |
| 1.3 Clustering coefficient . . . . .                                 | 2        |
| 1.4 Strongly Connected component (SCC) . . . . .                     | 2        |
| 1.5 Graph diameter and radius . . . . .                              | 2        |
| 1.6 Characteristic path length . . . . .                             | 3        |
| 1.7 Average number of neighbors . . . . .                            | 3        |
| <b>2 Shortest Routes of Regulations Within Transcription Factors</b> | <b>3</b> |
| <b>3 Sources of Transcription Factor Information</b>                 | <b>3</b> |

## List of Tables

|                                                                                                        |   |
|--------------------------------------------------------------------------------------------------------|---|
| 1 Shortest routes among deregulated TFs are enumerated for breast and colorectal cancer. . . . .       | 4 |
| 2 Manually curated transcription factors related to breast and colorectal cancer with sources. . . . . | 5 |

## 1 Terminologies Related to Network Topology

In the present work, a directed network of miRNAs and TFs are built across human genome. A directed graph (or digraph)  $G$  is a collection of a set of vertices  $V$  and a set of edges  $E$ . This, formally, is often denoted as  $G = (V, E)$ . For a digraph  $E$  is a set of ordered pairs of vertices. These orderings are often realized by arrows or directed edges.

### 1.1 Density

Density of a directed graph  $G$  is equal to the proportion of possible arcs present in the digraph. This is defined as follows:

$$\Delta(G) = \frac{|E|}{|V|(|V| - 1)}$$

Here,  $|E|$  indicated the number of arcs present in the network and  $|V|$  indicated the number of vertices. It is clear that the denominator of the above expression indicates the possible number of arcs. It is clear that graph density may range from  $[0,1]$ .

### 1.2 Betweenness centrality of nodes

This measures the centrality of a node in the corresponding network. Numerically, this is the count of the shortest paths between all possible pair of vertices in the network that pass through the subject node. Formally, for any vertex  $v$  it is defined as follows:

$$g(v) = \sum_{s \neq v \neq t} \frac{\sigma_{st}(v)}{\sigma_{st}}$$

Here,  $\sigma_{st}(v)$  is the number shortest paths from node  $s$  to  $t$  that pass through  $v$  whereas,  $\sigma_{st}$  is the number of shortest paths from  $s$  to  $t$ .

### 1.3 Clustering coefficient

In a directed  $G$ , clustering coefficient of a node  $v$  is defined as follows:

$$C(v) = \frac{e_v}{k_v(k_v - 1)}$$

Here,  $e_v$  is the number of connected pairs between all neighbors of  $v$  whereas,  $k_v$  is the number of neighbors of  $v$ . Clustering coefficient of all nodes can be averaged to obtain the clustering coefficient of the concerned network. Clustering coefficient of a node and the average clustering coefficient of a network both may range between  $[0,1]$ .

### 1.4 Strongly Connected component (SCC)

A directed graph is called strongly connected if each vertex is reachable from every other vertices. Strongly Connected Components (SCC) of a digraph  $G$  are its maximal strongly connected subgraphs. SCC containing a single node is trivial where as more than one nodes are non-trivial.

### 1.5 Graph diameter and radius

Graph diameter  $D(G)$  is the length of the longest shortest path (i.e., the longest graph geodesic) between any two vertices in the graph.

$$\max_{u,v} d(u, v)$$

where  $d(u, v)$  denotes length of the shortest path between  $u$  and  $v$ . On the other hand graph radius  $R(G)$  is defined as the minimum graph eccentricity of any vertex in a graph.

$$R(G) = \min_v \max_s d(v, s)$$

### **1.6 Characteristic path length**

Average shortest path length is known as the characteristic path length. This give the expected distance between two connected nodes.

### **1.7 Average number of neighbors**

The average number of neighbors indicates the expected size of the neighborhood of any connected vertex. This is obtained by averaging on the individual neighborhood sizes of all the vertices in a graph.

## **2 Shortest Routes of Regulations Within Transcription Factors**

Many possible regulatory links are found within the TF pairs of the breast and colorectal cancer specific DSCS modules. The shortest directed routes are furnished in Table 1.

## **3 Sources of Transcription Factor Information**

Transcription factors that are implicated in the breast and colorectal cancers are manually curated from literature. The associated PUBMED IDs/ DOI are furnished fin the Table 2.

| breast cancer related shortest routes |            |         |         |       | colorectal cancer related shortest routes |          |         |          |          |        |          |       |
|---------------------------------------|------------|---------|---------|-------|-------------------------------------------|----------|---------|----------|----------|--------|----------|-------|
| AP1                                   | MIR-136    | E2F1    |         |       | EGFR                                      | MIR-21   | KLF5    | MYC      | MIR-106B | POU3F2 | MIR-222  | ETS2  |
| AP1                                   | MIR-206    | ETS1    |         |       | EGFR                                      | MIR-21   | KLF5    | MYC      | MIR-34A  | KLF4   |          |       |
| AP1                                   | MIR-34A    | MYB     |         |       | EGFR                                      | MIR-21   | KLF5    |          |          |        |          |       |
| AP1                                   | MIR-204    | POU2F2  | MYC     |       | EGFR                                      | MIR-21   | KLF5    | MYC      |          |        |          |       |
| AP1                                   | MIR-203    | RUNX2   |         |       | EGFR                                      | MIR-21   | KLF5    | MYC      | MIR-106B | POU3F2 | MIR-181B | PROX1 |
| E2F1                                  | MYC        |         |         |       | EGFR                                      | MIR-21   | KLF5    | MYC      | MIR-106B | STAT3  |          |       |
| ER                                    | MIR-136    | E2F1    |         |       | EGFR                                      | MIR-21   | KLF5    | MYC      | MIR-106B | TCF4   |          |       |
| ER                                    | MIR-155    | ETS1    |         |       | GATA                                      | MIR-7    | EGFR    |          |          |        |          |       |
| ER                                    | MIR-155    | MYB     |         |       | GATA                                      | MIR-222  | ETS2    |          |          |        |          |       |
| ER                                    | MIR-202    | POU2F2  | MYC     |       | GATA                                      | MIR-29A  | KLF4    |          |          |        |          |       |
| ER                                    | MIR-155    | MYB     | MIR-203 | RUNX2 | GATA                                      | MIR-145  | KLF5    |          |          |        |          |       |
| ETS1                                  | MYB        | MIR-136 | E2F1    |       | GATA                                      | MIR-34B  | MYC     |          |          |        |          |       |
| ETS1                                  | MYB        |         |         |       | GATA                                      | MIR-181B | PROX1   |          |          |        |          |       |
| ETS1                                  | MYB        | MIR-210 | POU2F2  | MYC   | GATA                                      | MIR-181B | STAT3   |          |          |        |          |       |
| ETS1                                  | MYB        | MIR-203 | RUNX2   |       | GATA                                      | MIR-29A  | TCF4    |          |          |        |          |       |
| MYB                                   | MIR-136    | E2F1    |         |       | KLF5                                      | MYC      | MIR-93  | POU3F2   | MIR-7    | EGFR   |          |       |
| MYB                                   | MIR-206    | ETS1    |         |       | KLF5                                      | MYC      | MIR-93  | POU3F2   | MIR-222  | ETS2   |          |       |
| MYB                                   | LET-7A     | POU2F2  | MYC     |       | KLF5                                      | MYC      | MIR-29A | KLF4     |          |        |          |       |
| MYB                                   | MIR-203    | RUNX2   |         |       | KLF5                                      | MYC      |         |          |          |        |          |       |
| P53                                   | MIR-136    | E2F1    |         |       | KLF5                                      | MYC      | MIR-93  | STAT3    | MIR-181B | PROX1  |          |       |
| P53                                   | MIR-206    | ETS1    |         |       | KLF5                                      | MYC      | MIR-93  | STAT3    |          |        |          |       |
| P53                                   | MIR-34C-5P | MYB     |         |       | KLF5                                      | MYC      | MIR-29A | TCF4     |          |        |          |       |
| P53                                   | MIR-204    | POU2F2  | MYC     |       | MYC                                       | MIR-141  | POU3F2  | MIR-7    | EGFR     |        |          |       |
| P53                                   | MIR-204    | RUNX2   |         |       | MYC                                       | MIR-141  | POU3F2  | MIR-222  | ETS2     |        |          |       |
| PAX5                                  | MIR-136    | E2F1    |         |       | MYC                                       | MIR-29A  | KLF4    |          |          |        |          |       |
| PAX5                                  | MIR-206    | ETS1    |         |       | MYC                                       | MIR-141  | KLF5    |          |          |        |          |       |
| PAX5                                  | MIR-34A    | MYB     |         |       | MYC                                       | MIR-93   | STAT3   | MIR-181B | PROX1    |        |          |       |
| PAX5                                  | MIR-202    | POU2F2  | MYC     |       | MYC                                       | MIR-93   | STAT3   |          |          |        |          |       |
| PAX5                                  | MIR-203    | RUNX2   |         |       | MYC                                       | MIR-141  | TCF4    |          |          |        |          |       |
| POU2F2                                | MYC        |         |         |       | P53                                       | MIR-7    | EGFR    |          |          |        |          |       |
| WT1                                   | MIR-136    | E2F1    |         |       | P53                                       | MIR-130B | POU3F2  | MIR-222  | ETS2     |        |          |       |
| WT1                                   | MIR-206    | ETS1    |         |       | P53                                       | MIR-135B | KLF4    |          |          |        |          |       |
| WT1                                   | MYB        |         |         |       | P53                                       | MIR-141  | KLF5    |          |          |        |          |       |
| WT1                                   | LET-7A     | POU2F2  | MYC     |       | P53                                       | MIR-145  | MYC     |          |          |        |          |       |
| WT1                                   | MIR-203    | RUNX2   |         |       | P53                                       | MIR-181B | PROX1   |          |          |        |          |       |
|                                       |            |         |         |       | P53                                       | MIR-106B | STAT3   |          |          |        |          |       |
|                                       |            |         |         |       | P53                                       | MIR-130B | TCF4    |          |          |        |          |       |
|                                       |            |         |         |       | STAT3                                     | MIR-181B | POU3F2  | MIR-7    | EGFR     |        |          |       |
|                                       |            |         |         |       | STAT3                                     | MIR-181B | POU3F2  | MIR-222  | ETS2     |        |          |       |
|                                       |            |         |         |       | STAT3                                     | MYC      | MIR-29A | KLF4     |          |        |          |       |
|                                       |            |         |         |       | STAT3                                     | MYC      | MIR-141 | KLF5     |          |        |          |       |
|                                       |            |         |         |       | STAT3                                     | MYC      |         |          |          |        |          |       |
|                                       |            |         |         |       | STAT3                                     | MIR-181B | PROX1   |          |          |        |          |       |
|                                       |            |         |         |       | STAT3                                     | MYC      | MIR-29A | TCF4     |          |        |          |       |

Table 1: Shortest routes among deregulated TFs are enumerated for breast and colorectal cancer.

| TFs related to breast cancer | Source                    | TFs related to colorectal cancer | Source         |
|------------------------------|---------------------------|----------------------------------|----------------|
| p53                          | doi: 10.1677/erc.0.005027 | TCF4                             | PMID: 21983179 |
| Myc                          | doi: 10.1677/erc.0.005027 | PROX1                            | PMID: 21970873 |
| myb                          | PMID: 21953443            | TNF                              | PMID: 21945666 |
| wt1                          | PMID: 21710692            | P53                              | PMID: 21927023 |
| ER                           | PMID: 18312651            | EGFR                             | PMID: 21924350 |
| RUNX2                        | PMID: 15665096            | KLF5                             | PMID: 21885866 |
| ETS1                         | PMID: 20392592            | MYC                              | PMID: 21851818 |
| AP1                          | PMID: 17637753            | STAT3                            | PMID: 21840932 |
| E2F1                         | PMID: 21573702            | KLF4                             | PMID: 21814594 |
| PAX5                         | PMID: 21710692            | GATA                             | PMID: 21779441 |
| POU2F2                       | PMID: 19424592            | ETS2                             | PMID: 21763315 |

Table 2: Manually curated transcription factors related to breast and colorectal cancer with sources.
