# Supplementary material for: Topological patterns in microRNA–gene regulatory network: studies in colorectal and breast cancer
Source: Royal Society of Chemistry journal article supplement (doi:10.1039/c3mb25518b), 2013-02-13
Supplement: c3mb25518b.xlsx [file c3mb25518b.xlsx]

## Sheet: Pathways Interfered
Pathways Interfered by TFs in giant SCC of the complete network	Pathways Interfered by miRNAs in giant SCC of the complete network
ATF-2 transcription factor network	Chemokine signaling pathway
Regulation of nuclear SMAD2/3 signaling	ECM-receptor interaction
Pathways in cancer	MAPK signaling pathway
Validated targets of C-MYC transcriptional repression	Axon guidance
Chronic myeloid leukemia	Cytokine-cytokine receptor interaction
Signaling mediated by p38-alpha and p38-beta	Wnt signaling pathway
PDGF signaling pathway	Calcium signaling pathway
Acute myeloid leukemia	Regulation of actin cytoskeleton
FOXA1 transcription factor network	Jak-STAT signaling pathway
C-MYB transcription factor network	Melanogenesis
EGF Signaling Pathway	Pathways in cancer
Prostate cancer	Focal adhesion
Non-small cell lung cancer	Type II diabetes mellitus
Apoptosis signaling pathway	Pancreatic cancer
E2F transcription factor network	GnRH signaling pathway
IL-10 Anti-inflammatory Signaling Pathway	Neurotrophin signaling pathway
Keratinocyte Differentiation	Insulin signaling pathway
Signaling events mediated by HDAC Class I	Small cell lung cancer
NFkB activation by Nontypeable Hemophilus influenzae	Melanoma
Endometrial cancer	TGF-beta signaling pathway
Small cell lung cancer	Salivary secretion
Direct p53 effectors	Adipocytokine signaling pathway
MAPKinase Signaling Pathway	Prostate cancer
MAPK signaling pathway	Cell cycle
Genes involved in Gene Expression	Chagas disease
ALK in cardiac myocytes	Endocytosis
Thyroid cancer	Gap junction
Toll-like receptor signaling pathway	Glioma
Cadmium induces DNA synthesis and proliferation in macrophages	Vascular smooth muscle contraction
Downstream signaling in naive CD8+ T cells	Natural killer cell mediated cytotoxicity
Inhibition of Cellular Proliferation by Gleevec	Basal cell carcinoma
Calcium signaling in the CD4+ TCR pathway	Non-small cell lung cancer
Genes involved in Toll Like Receptor 3 (TLR3) Cascade	Acute myeloid leukemia
Angiopoietin receptor Tie2-mediated signaling	Dilated cardiomyopathy
Maturity onset diabetes of the young	Chronic myeloid leukemia
Melanoma	Long-term potentiation
Colorectal cancer	Renal cell carcinoma
Intracellular Signalling Through Adenosine Receptor A2a and Adenosine	ErbB signaling pathway
METS affect on Macrophage Differentiation	Apoptosis
Role of EGF Receptor Transactivation by GPCRs in Cardiac Hypertrophy	T cell receptor signaling pathway
Genes involved in Toll Receptor Cascades	Toll-like receptor signaling pathway
Intracellular Signalling Through Adenosine Receptor A2b and Adenosine	Huntingtons disease
Genes involved in RNA Polymerase III Transcription	Parkinsons disease
Genes involved in TRAF6 Mediated Induction of the antiviral cytokine IFN-alphaeta cascade	Long-term depression
TGF-beta signaling pathway	Viral myocarditis
Effects of calcineurin in Keratinocyte Differentiation	Bladder cancer
Glioma	Notch signaling pathway
Signaling Pathway from G-Protein Families	Hypertrophic cardiomyopathy (HCM)
Nuclear Factor Kappa B signaling	Thyroid cancer
Validated targets of C-MYC transcriptional activation	Endometrial cancer
T Cell Receptor Signaling Pathway	Alzheimers disease
Genes involved in MAPK targets/Nuclear events mediated by MAP kinases	Colorectal cancer
Hypoxia-Inducible Factor in the Cardiovascular System	Amyotrophic lateral sclerosis (ALS)
altered phosphatodylinositol 3-kinase-Akt signaling	Epithelial cell signaling in Helicobacter pylori infection
p38 MAPK Signaling Pathway	p53 signaling pathway
Genes involved in G1 Phase	Fc epsilon RI signaling pathway
B cell receptor signaling pathway	VEGF signaling pathway
Differentiation Pathway in PC12 Cells; this is a specific case of PAC1 Receptor Pathway.	Progesterone-mediated oocyte maturation
TPO Signaling Pathway	Fc gamma R-mediated phagocytosis
Tumor Suppressor Arf Inhibits Ribosomal Biogenesis	Adherens junction
Map Kinase Inactivation of SMRT Corepressor	Oocyte meiosis
CARM1 and Regulation of the Estrogen Receptor	Phosphatidylinositol signaling system
Hypoxia response via HIF activation
Neuropeptides VIP and PACAP inhibit the apoptosis of activated T cells
Renal cell carcinoma
nuclear factor of activated T-cells signaling

## Sheet: Breast DSCS
Regulator	Regulated
MIR-34C-3P	GATA3
MIR-34A	MYB
MIR-149	POU2F2
MIR-206	ETS1
MIR-206	THBS1
MIR-34C-5P	MYB
MIR-204	RUNX2
MIR-155	FOS
MIR-34A	GATA3
MIR-125A-3P	ABCC5
MIR-125A-5P	ETS1
MIR-34A	ABCC5
MIR-206	ABCC5
MIR-34C-5P	ABCC5
MIR-136	E2F1
LET-7D	POU2F2
LET-7A	POU2F2
MIR-34C-5P	GATA3
MIR-204	BCL2
MIR-136	BCL2
MIR-125A-5P	BCL2
MIR-125B	ETS1
MIR-101	FOS
MIR-101	HRB
MIR-125B	BCL2
LET-7I	POU2F2
MIR-149	FOS
MIR-125A-5P	ABCC5
MIR-10B	GATA3
MIR-101	ABCC5
MIR-34B	GRB2
MIR-203	RUNX2
LET-7F	POU2F2
MIR-34C-3P	GRB2
MIR-125B	ABCC5
MIR-155	MYB
LET-7A	ABCC5
LET-7F	ABCC5
MIR-101	ETV5
MIR-191	CREBBP
MIR-155	ETS1
LET-7D	ABCC5
MIR-34B	RUNX2
MIR-206	TGFBR3
LET-7I	ABCC5
MIR-210	POU2F2
MIR-128	GATA3
MIR-206	CSH1
MIR-34C-3P	RUNX2
MIR-128	ABCC5
MIR-203	APC
MIR-202	POU2F2
MIR-203	ETV5
MIR-204	POU2F2
E2F1	E2F1
E2F1	MYC
E2F1	BCL2
FOS	FOS
MYB	MYB
MYC	MYC
ATF3	ATF3
POU2F2	MYC
RUNX2	RUNX2
RELB	RELB
GATA3	TEK
ELF1	CD2
ELF1	ITGB2
ETS1	MYB
ETS1	PRL
FOS	RELB
WT1	MYB
WT1	MIR-34A
WT1	MIR-34A*
PAX5	MIR-34A
PAX5	MIR-34A*
AP1	MIR-34A
AP1	MIR-34A*
WT1	MIR-101*
WT1	MIR-101
P53	MIR-101*
P53	MIR-101
PAX5	MIR-101*
PAX5	MIR-101
PAX5	MIR-9*
ER	MIR-9*
WT1	MIR-9*
MYB	MIR-9*
P53	MIR-9*
AP1	MIR-9*
MYB	MIR-10B
MYB	MIR-10B*
WT1	MIR-10B
WT1	MIR-10B*
PAX5	MIR-10B
PAX5	MIR-10B*
MYB	MIR-149
MYB	MIR-149*
ER	MIR-149
ER	MIR-149*
PAX5	MIR-149
PAX5	MIR-149*
AP1	MIR-149
AP1	MIR-149*
P53	MIR-149
P53	MIR-149*
WT1	MIR-149
WT1	MIR-149*
PAX5	MIR-191
PAX5	MIR-191*
MYB	MIR-191
MYB	MIR-191*
AP1	MIR-191
AP1	MIR-191*
WT1	MIR-191
WT1	MIR-191*
ER	MIR-191
ER	MIR-191*
P53	MIR-191
P53	MIR-191*
AP1	MIR-143*
AP1	MIR-143
AP1	MIR-145
AP1	MIR-145*
PAX5	MIR-143*
PAX5	MIR-143
PAX5	MIR-145
PAX5	MIR-145*
MYB	MIR-143*
MYB	MIR-143
MYB	MIR-145
MYB	MIR-145*
P53	MIR-143*
P53	MIR-143
P53	MIR-145
P53	MIR-145*
PAX5	MIR-206
MYB	MIR-206
WT1	MIR-206
P53	MIR-206
AP1	MIR-206
PAX5	MIR-196B
PAX5	MIR-196B*
AP1	MIR-196B
AP1	MIR-196B*
P53	MIR-196B
P53	MIR-196B*
WT1	MIR-196B
WT1	MIR-196B*
MYB	MIR-196B
MYB	MIR-196B*
ER	MIR-196B
ER	MIR-196B*
ER	MIR-101
AP1	MIR-101
MYB	MIR-101
PAX5	MIR-204
P53	MIR-204
AP1	MIR-204
PAX5	LET-7A
PAX5	LET-7A*
PAX5	LET-7F
PAX5	LET-7D
PAX5	LET-7D*
ER	LET-7A
ER	LET-7A*
ER	LET-7F
ER	LET-7D
ER	LET-7D*
MYB	LET-7A
MYB	LET-7A*
MYB	LET-7F
MYB	LET-7D
MYB	LET-7D*
PAX5	MIR-202*
PAX5	MIR-202
ER	MIR-202*
ER	MIR-202
WT1	MIR-202*
WT1	MIR-202
PAX5	MIR-210
WT1	MIR-210
MYB	MIR-210
P53	MIR-210
AP1	MIR-34B*
AP1	MIR-34B
AP1	MIR-34C-5P
AP1	MIR-34C-3P
MYB	MIR-34B*
MYB	MIR-34B
MYB	MIR-34C-5P
MYB	MIR-34C-3P
P53	MIR-34B*
P53	MIR-34B
P53	MIR-34C-5P
P53	MIR-34C-3P
PAX5	MIR-34B*
PAX5	MIR-34B
PAX5	MIR-34C-5P
PAX5	MIR-34C-3P
WT1	MIR-34B*
WT1	MIR-34B
WT1	MIR-34C-5P
WT1	MIR-34C-3P
PAX5	MIR-125B
PAX5	MIR-125B-1*
MYB	MIR-125B
MYB	MIR-125B-1*
WT1	MIR-125B
WT1	MIR-125B-1*
AP1	MIR-125B
AP1	MIR-125B-1*
PAX5	LET-7A-2*
ER	MIR-125B
ER	MIR-125B-1*
ER	LET-7A-2*
MYB	LET-7A-2*
WT1	MIR-196A
WT1	MIR-196A*
MYB	MIR-196A
MYB	MIR-196A*
AP1	MIR-196A
AP1	MIR-196A*
PAX5	MIR-196A
PAX5	MIR-196A*
ER	MIR-196A
ER	MIR-196A*
P53	MIR-196A
P53	MIR-196A*
AP1	LET-7I
AP1	LET-7I*
PAX5	LET-7I
PAX5	LET-7I*
P53	LET-7I
P53	LET-7I*
MYB	LET-7I
MYB	LET-7I*
WT1	LET-7I
WT1	LET-7I*
PAX5	MIR-136
PAX5	MIR-136*
MYB	MIR-136
MYB	MIR-136*
ER	MIR-136
ER	MIR-136*
P53	MIR-136
P53	MIR-136*
AP1	MIR-136
AP1	MIR-136*
WT1	MIR-136
WT1	MIR-136*
PAX5	MIR-203
MYB	MIR-203
AP1	MIR-203
WT1	MIR-203
MYB	MIR-21*
PAX5	MIR-21*
AP1	MIR-21*
MYB	MIR-122
MYB	MIR-122*
PAX5	MIR-122
PAX5	MIR-122*
AP1	MIR-122
AP1	MIR-122*
ER	MIR-122
ER	MIR-122*
WT1	MIR-122
WT1	MIR-122*
P53	MIR-122
P53	MIR-122*
AP1	MIR-125A-5P
AP1	MIR-125A-3P
PAX5	MIR-125A-5P
PAX5	MIR-125A-3P
MYB	MIR-125A-5P
MYB	MIR-125A-3P
WT1	MIR-125A-5P
WT1	MIR-125A-3P
PAX5	MIR-125B-2*
P53	MIR-125B
P53	MIR-125B-2*
ER	MIR-125B-2*
MYB	MIR-125B-2*
WT1	MIR-125B-2*
AP1	MIR-125B-2*
PAX5	MIR-155
PAX5	MIR-155*
ER	MIR-155
ER	MIR-155*
P53	MIR-155
P53	MIR-155*
MYB	MIR-155
MYB	MIR-155*
WT1	MIR-155
WT1	MIR-155*
AP1	MIR-155
AP1	MIR-155*
WT1	LET-7A
WT1	LET-7A*
P53	LET-7A
P53	LET-7A*
AP1	LET-7A
AP1	LET-7A*
PAX5	LET-7F-2*
WT1	LET-7F
WT1	LET-7F-2*
ER	LET-7F-2*
MYB	LET-7F-2*

## Sheet: Colorectal DSCS
Regulator	Regulated
MIR-135B	APC
MIR-135B	KLF4
MIR-145	KLF4
MIR-145	MYC
MIR-181B	BCL2
MIR-181B	MAP3K10
MIR-195	BCL2
MIR-19A	PRMT5
MIR-205	IL32
MIR-20A	BCL2
MIR-20A	MYC
MIR-21	BCL2
MIR-21	TGFBI
MIR-21	TGFBR3
MIR-29A	BCL2
MIR-34A	BCL2
MIR-34A	MYC
MIR-34B	MYC
MIR-34B*	BCL2
MIR-34B*	MYC
MIR-378	MYC
MIR-7	EGFR
MIR-96	PRMT5
MIR-135B	NR3C2
MIR-139-5P	TCF4
MIR-223	ATP7A
MIR-141	KLF5
MIR-130B	POU3F2
MIR-212	TCF4
MIR-7	SQSTM1
MIR-93	TCF4
MIR-338-3P	ARPC1B
MIR-106A	STAT3
MIR-34A	MLLT3
MIR-20A	STAT3
MIR-93	STAT3
MIR-497	BCL2
MIR-130B	TCF4
MIR-203	TCF4
MIR-127-5P	NR3C2
MIR-212	HNRPM
MIR-7	KLF4
MIR-185	MLLT3
MIR-181B	MADD
MIR-106A	TCF4
MIR-195	TGFBR3
MIR-26A	BHLHB2
MIR-223	TCF4
MIR-211	POU3F2
MIR-106B	STAT3
MIR-29A	KLF4
MIR-338-5P	POU3F2
MIR-141	POU3F2
MIR-93	SQSTM1
MIR-497	LMOD1
MIR-139-5P	BCL2
MIR-106B	SQSTM1
MIR-31	NR3C2
MIR-93	FOXF1
MIR-19A	ABCD3
MIR-30C	PTP4A1
MIR-212	SLC31A1
MIR-20A	TCF4
MIR-222	SLC31A1
MIR-34A	KLF4
MIR-497	TTC1
MIR-224	GRIA4
MIR-346	GPX4
MIR-222	PLEKHC1
MIR-338-5P	GRIA4
MIR-106A	SQSTM1
MIR-19B	ABCD3
MIR-145	KLF5
MIR-21	KLF5
MIR-181B	BHLHB2
MIR-30D	PTP4A1
MIR-149	SRF
MIR-26A	RTN1
MIR-106A	IL8
MIR-133B	CASC3
MIR-212	PXN
MIR-130B	PTP4A1
MIR-185	SET
MIR-183	TCF4
MIR-211	AKAP1
MIR-181B	PHLDA1
MIR-26A	PTP4A1
MIR-338-5P	BCL2
MIR-181B	NSMAF
MIR-30D	STS
MIR-30D	CXORF6
MIR-93	IL8
MIR-211	TCF4
MIR-20A	IL8
MIR-106B	TCF4
MIR-211	BCL2
MIR-34A	ADRA2B
MIR-497	TGFBR3
MIR-20A	SQSTM1
MIR-195	PLEKHC1
MIR-135B	GRIA4
MIR-195	STXBP3
MIR-223	APC
MIR-497	PLEKHC1
MIR-19A	POU3F2
MIR-19B	RTN1
MIR-224	CASC3
MIR-181B	STAT3
MIR-195	LMOD1
MIR-203	PXN
MIR-29A	TCF4
MIR-133B	MLLT3
MIR-26A	CKS2
MIR-96	AP2B1
MIR-7	TCF4
MIR-338-5P	PLEKHC1
MIR-145	TCF4
MIR-18A	CDK2
MIR-29A	PLEKHC1
MIR-30C	ACTR1A
MIR-135B	NSMAF
MIR-34A	ACTR1A
MIR-19A	NR3C2
MIR-19B	NR3C2
MIR-497	STXBP3
MIR-181B	TGFBI
MIR-96	PTP4A1
MIR-106B	SET
MIR-106A	FOXF1
MIR-130B	RTN1
MIR-106B	IL8
MIR-139-5P	ATP7A
MIR-19B	PNRC1
MIR-224	NSMAF
MIR-26A	GRIA4
MIR-212	PSMA2
MIR-20A	SET
MIR-19B	POU3F2
MIR-130B	AKAP1
MIR-135B	PLEKHC1
MIR-141	TCF4
MIR-93	SET
MIR-19B	TCF4
MIR-182	CFL1
MIR-19A	RTN1
MIR-30D	SLC6A9
MIR-30C	SLC6A9
MIR-30C	STS
MIR-195	TTC1
MIR-338-5P	ETS2
MIR-203	PTP4A1
MIR-106A	SET
MIR-20A	FOXF1
MIR-141	PTP4A1
MIR-29A	SLC31A1
MIR-338-5P	TCF4
MIR-182	SLC31A1
MIR-130B	PSD
MIR-7	ADRA2B
MIR-30D	ACTR1A
MIR-106B	FOXF1
MIR-30C	CXORF6
MIR-19A	PNRC1
MIR-19A	TCF4
MIR-130B	NR3C2
MIR-224	CXORF6
MIR-338-5P	PNRC1
MIR-205	GRIA4
MIR-205	NR3C2
MIR-93	AP2B1
MIR-93	POU3F2
MIR-141	SLC6A9
MIR-106A	AP2B1
MIR-20A	AP2B1
MIR-26A	PNRC1
MIR-181B	POU3F2
MIR-106B	AP2B1
MIR-19A	PTP4A1
MIR-19B	PTP4A1
MIR-203	AP2B1
MIR-106B	PSD
MIR-211	NR3C2
MIR-31	EIF4A1
MIR-338-5P	ATP7A
MIR-338-5P	KLF5
MIR-93	PSD
MIR-224	POU3F2
MIR-19B	PSD
MIR-205	ATP7A
MIR-19A	PSD
MIR-19B	ACTN1
MIR-181B	PROX1
MIR-145	ADRA2B
MIR-106A	PSD
MIR-203	APC
MIR-183	RORC
MIR-224	NR4A1
MIR-338-5P	TCEAL1
MIR-223	GRIA4
MIR-205	FOXF1
MIR-222	ETS2
MIR-30D	ADRA2B
MIR-106B	POU3F2
MIR-205	SNRPF
MIR-212	TGFBI
MIR-21	SET
MIR-30C	TCF4
MIR-106A	POU3F2
MIR-20A	POU3F2
MIR-133B	ZNF131
MIR-19A	ACTN1
MIR-328	LMOD1
MIR-106B	PPP1R1A
MIR-20A	PSD
MIR-30D	TCF4
MIR-96	TCF4
MIR-145	AP2B1
MIR-19A	AKAP1
MIR-133B	EIF4A1
MIR-19B	AKAP1
MIR-20A	PPP1R1A
MIR-30C	ADRA2B
MIR-106A	PPP1R1A
MIR-203	ATP7A
MIR-497	POU3F2
MIR-203	PHLDA1
MIR-93	PPP1R1A
MIR-211	MLLT3
MIR-195	POU3F2
MIR-141	BHLHB2
MIR-135B	EMP1
IRF8	CYBB
MYC	MYC
RELA	IL8
RELA	BCL2
RELA	TNF
STAT3	MYC
KLF5	MYC
IRF8	LAPTM5
RELA	CFL1
RELA	MAP2K2
RELA	PIP5K1A
RELA	MYC
FOXF1	IL8
MYC	MIR-106A
MYC	MIR-106A*
MYC	MIR-18A
MYC	MIR-18A*
MYC	MIR-19A*
MYC	MIR-19A
MYC	MIR-19B
MYC	MIR-20A
MYC	MIR-20A*
MYC	MIR-195
MYC	MIR-195*
MYC	MIR-29A*
MYC	MIR-29A
MYC	MIR-26A
MYC	MIR-34A
MYC	MIR-34A*
STAT3	MIR-21
STAT3	MIR-21*
EGFR	MIR-21
EGFR	MIR-21*
MYC	MIR-141*
MYC	MIR-141
MYC	MIR-19A*
MYC	MIR-19A
MYC	MIR-19B
TNF	MIR-31
TNF	MIR-31*
STAT3	MIR-21
STAT3	MIR-21*
STAT3	MIR-181B
MYC	MIR-20A
MYC	MIR-20A*
MYC	MIR-106A
MYC	MIR-106A*
MYC	MIR-106B
MYC	MIR-106B*
MYC	MIR-93
MYC	MIR-93*
STAT3	MIR-21
STAT3	MIR-21*
POU3F2	MIR-34A
POU3F2	MIR-34A*
POU3F2	MIR-30C
GATA	MIR-30C
GATA	MIR-181B
POU3F2	MIR-181B
P53	MIR-135B
P53	MIR-135B*
POU3F2	MIR-205
POU3F2	MIR-205*
GATA	MIR-205
GATA	MIR-205*
P53	MIR-205
P53	MIR-205*
POU3F2	MIR-149
POU3F2	MIR-149*
P53	MIR-149
P53	MIR-149*
P53	MIR-26A
POU3F2	MIR-26A
SRF	MIR-26A
POU3F2	MIR-95
GATA	MIR-95
P53	MIR-95
GATA	MIR-145
GATA	MIR-145*
POU3F2	MIR-145
POU3F2	MIR-145*
P53	MIR-145
P53	MIR-145*
POU3F2	MIR-378*
POU3F2	MIR-378
GATA	MIR-378*
GATA	MIR-378
POU3F2	MIR-133B
GATA	MIR-133B
P53	MIR-133B
SRF	MIR-30C
P53	MIR-30C
POU3F2	MIR-93
POU3F2	MIR-93*
POU3F2	MIR-106B
POU3F2	MIR-106B*
P53	MIR-93
P53	MIR-93*
P53	MIR-106B
P53	MIR-106B*
SRF	MIR-93
SRF	MIR-93*
SRF	MIR-106B
SRF	MIR-106B*
POU3F2	MIR-182
POU3F2	MIR-182*
POU3F2	MIR-96
POU3F2	MIR-96*
POU3F2	MIR-183
POU3F2	MIR-183*
GATA	MIR-182
GATA	MIR-182*
GATA	MIR-96
GATA	MIR-96*
GATA	MIR-183
GATA	MIR-183*
GATA	MIR-29A*
GATA	MIR-29A
POU3F2	MIR-29A*
POU3F2	MIR-29A
P53	MIR-30D
P53	MIR-30D*
POU3F2	MIR-30D
POU3F2	MIR-30D*
GATA	MIR-30D
GATA	MIR-30D*
POU3F2	MIR-31
POU3F2	MIR-31*
GATA	MIR-31
GATA	MIR-31*
GATA	MIR-7
POU3F2	MIR-7
P53	MIR-181B
POU3F2	MIR-346
GATA	MIR-346
P53	MIR-346
P53	MIR-210
P53	MIR-139-5P
P53	MIR-139-3P
POU3F2	MIR-139-5P
POU3F2	MIR-139-3P
SRF	MIR-139-5P
SRF	MIR-139-3P
GATA	MIR-34B*
GATA	MIR-34B
POU3F2	MIR-34B*
POU3F2	MIR-34B
P53	MIR-34B*
P53	MIR-34B
P53	MIR-141*
P53	MIR-141
GATA	MIR-26A
POU3F2	MIR-18A
POU3F2	MIR-18A*
POU3F2	MIR-19A*
POU3F2	MIR-19A
POU3F2	MIR-20A
POU3F2	MIR-20A*
POU3F2	MIR-19B
P53	MIR-127-5P
P53	MIR-127-3P
POU3F2	MIR-127-5P
POU3F2	MIR-127-3P
SRF	MIR-203
POU3F2	MIR-203
GATA	MIR-211
POU3F2	MIR-211
SRF	MIR-211
GATA	MIR-422A
P53	MIR-422A
SRF	MIR-422A
POU3F2	MIR-422A
P53	MIR-7
GATA	MIR-328
POU3F2	MIR-328
P53	MIR-328
POU3F2	MIR-212
P53	MIR-212
POU3F2	MIR-195
POU3F2	MIR-195*
POU3F2	MIR-497
POU3F2	MIR-497*
GATA	MIR-21
GATA	MIR-21*
POU3F2	MIR-21
POU3F2	MIR-21*
SRF	MIR-99B
SRF	MIR-99B*
POU3F2	MIR-99B
POU3F2	MIR-99B*
GATA	MIR-185
GATA	MIR-185*
P53	MIR-185
P53	MIR-185*
POU3F2	MIR-185
POU3F2	MIR-185*
POU3F2	MIR-130B*
POU3F2	MIR-130B
P53	MIR-130B*
P53	MIR-130B
POU3F2	MIR-222*
POU3F2	MIR-222
GATA	MIR-222*
GATA	MIR-222
POU3F2	MIR-223*
POU3F2	MIR-223
GATA	MIR-223*
GATA	MIR-223
P53	MIR-223*
P53	MIR-223
POU3F2	MIR-106A
POU3F2	MIR-106A*
GATA	MIR-19B
GATA	MIR-106A
GATA	MIR-106A*
POU3F2	MIR-503
GATA	MIR-503
GATA	MIR-224
GATA	MIR-224*
POU3F2	MIR-224
POU3F2	MIR-224*

## Sheet: SCCs of complete network
count .... 2
ID1
ID3
count .... 2
RARB
RARG
count .... 2
TCF4
ZNF521
count .... 2
GATAD2B
MLL2
count .... 3
HOXB2
HOXB5
HOXB6
count .... 3
PITX3
EMX1
SIX5
count .... 2
ZNF83
ZNF642
count .... 3
HOXC10
HOXC9
HOXC6
count .... 3
TERF2
ZNF498
POLE4
count .... 2
IRX5
IRX3
count .... 2
ZNF529
ZNF382
count .... 3
ZNF45
ZNF227
ZNF567
count .... 1009
NR1H3
TNF
IKZF1
STAT4
CEBPA
PPARG
CEBPB
IL1B
IL6
CEBPD
CTCF
MYC
BRCA1
NFAT5
TFAP2A
KLF12
KLF6
CREB1
EGR1
FOS
MITF
CCND1
SOX9
ATF2
ATF3
PLAU
CREM
NKX2-5
TP53
CDKN2A
E2F1
E2F2
SP3
E2F3
E2F4
NR0B1
IL2
NFKB1
EGFR
ELK1
SREBF1
FOSL1
EGR2
AHR
EGR3
EGR4
ELF2
ELF3
AIRE
SRF
ELK3
ELK4
EP300
EPAS1
NR2F6
ESR1
HOXA10
PGR
TFAP2C
ESR2
ETS1
NR3C1
SP1
ETS2
ETV4
ZBTB16
EVI1
EWSR1
FGF9
ATF6
FOXM1
FOXO1
FOXO3
AR
NFASC
FLI1
FOSB
FOSL2
NR5A1
GABPA
TFAM
GABPB2
SIN3A
GATA1
LMO2
YBX1
WT1
GATA2
GATA3
GATA4
GATA6
HNF4A
GBX2
GFI1B
GFI1
GLI1
GLI2
GLI3
SETD2
PPARA
GRLF1
GTF2I
KCNIP3
HIF1A
HIVEP1
HMGB2
HMGA1
NR4A1
FOXA2
PDX1
HNF1A
ONECUT1
HNRPK
HOXA5
HOXA9
MAFB
HES1
REST
HSF1
HSF2
FOXN2
IRF8
IL12A
IL12B
FOXK2
IRF1
IRF2
IRF3
IRF4
IRF5
JUN
TGFB1
JUNB
JUND
ARNT
ZFP36
SMAD1
SMAD3
SMAD4
MAF
MAX
MAZ
MBD1
MEF2A
MEF2C
MEIS1
BCL6
MTF1
MYB
MYCN
MYF5
ZFHX3
AKT2
MYOD1
ATF1
TEAD1
NF1
NFATC1
NFATC2
NFATC3
NFATC4
NFE2L1
NFIC
LHX3
NFKB2
NFYA
DEK
NFYB
NFYC
NRF1
OTX1
PA2G4
PAX2
PAX3
PAX5
PAX6
PBX1
FOXP3
ZBTB7B
LEF1
ZNF219
ZBTB7A
TMBIM4
PKNOX1
POU1F1
VDR
POU2F1
POU2F2
POU3F2
POU6F1
ZNF444
FOXJ2
ARNTL2
PSMD10
REL
RELA
TLR2
RELB
RFX1
RFX3
RPA1
RPA2
RPA3
RXRA
PPARD
PRDM1
SOX2
SOX10
ELF4
MXI1
PRKCA
STAT1
KLF5
VHL
HAND1
SP2
SP4
SPI1
SREBF2
STAT3
TWIST1
STAT5A
STAT5B
STAT6
TBP
TBX5
TBX3
NR1H4
TCF3
TCF7L2
ZEB1
TEAD4
TFAP2B
NR2F2
TFDP1
TFE3
THRA
THRB
TP53BP1
NR2C1
NR2C2
NR1H2
USF1
USF2
YY1
CNBP
ZNF143
ZNF148
PAX8
BXDC5
TEAD2
RUNX2
RUNX1
NCOA1
NR1I2
ARHGEF7
FUBP1
LHX4
MTA1
TBPL1
NCOR1
ARX
HOXA11
MYBL2
NFIX
NFIB
ZBP1
DRAP1
GTF2E2
RC3H2
RERE
ZBTB20
ZNF207
ZNF317
ZNF44
BAZ2B
CDC5L
COPS3
ZBTB4
RXRB
TOX4
ZFY
NCOA2
TRIM23
ASH1L
LARP5
PITX1
RORA
SMARCC1
SSRP1
WHSC1
GRHL2
MBNL1
RNF138
OVOL2
NFX1
PBRM1
ZNF10
ZNF84
CUL1
CUL4B
LARP4
ZNF322A
ZNF445
ZNF638
ZNF644
PTEN
SNAI1
CUL4A
HMGB3
TRMT1
EVX1
LBX1
TFDP3
ZNF286A
ZNF423
IL-4
NFIA
CREBZF
HMX1
SPZ1
UBTF
ZNF777
CRX
DLX5
HOXA4
HOXA7
EZH2
DEPDC1B
DOT1L
E2F7
KNTC1
WDHD1
ZNF367
LHX6
EZH1
MESP2
CBLL1
NOC3L
NUFIP1
ZC3H8
ZNF131
ZNF670
CIZ1
ZNF771
MLX
ZNF582
LARP7
ZNF708
APTX
PATZ1
SIP1
ZBED4
ZNF160
ZNF346
ZNF672
NOC4L
PLAGL2
BACH2
ZC3H7B
ZNF451
PSMD12
ZNF473
ATXN7
FOXP1
H1FX
MYST3
FOXN3
KIAA2018
MIZF
PHF20
SETBP1
ZNF192
ZNF25
ZNF645
ZC3H7A
KLF9
NR4A3
ONECUT2
ESRRB
RBM22
HOXB8
TCF15
ELF1
GTF2H2
TBX2
MATR3
MYSM1
ZNF146
HIF3A
SPDEF
TOX3
EEA1
TGIF1
ZNF664
ZNF804B
IPF1
RGS6
ZNF598
ZNF384
GTF2F1
KLF2
SOX15
GSC
FOXD3
LHX5
MKX
PRDM8
ZFP36L2
ZNF548
ZNF653
TFCP2
POGZ
ZNF407
ZNF493
ZNF596
MYT1L
ETV6
TCF12
ARID2
BBX
CHD9
ZMAT3
PLEK
FOXJ3
ZMAT1
ZBTB47
BACH1
ZNF808
ST18
ZFP28
ZC3H6
ZNF532
NR6A1
BATF
POGK
ZNF491
ZNF551
RCOR3
NKX6-1
ZNF503
ZBTB38
KLF15
ZNF12
GATAD1
ZNF292
SNAPC4
SF3A2
ATF5
ZEB2
ZFPM2
AHCTF1
CHD6
ZNF611
ZNF75A
ZNF778
CHD2
PIP5K3
BMP4
ZNF264
ZNF302
ZBTB33
RBM26
ZBTB6
ZNF780B
SOX1
ZNF655
ZBTB44
SRCAP
FIZ1
TRIM3
TSHZ2
ZNF141
ZNF337
ZNF507
ZNF564
ZNF628
ZNF776
ZNF497
MKRN2
MLL
ADNP
ZNF609
FOXL1
LGR4
YOD1
ZNF552
POLE3
GLIS3
HLF
ZNF462
ANAPC2
PDLIM7
ZNF333
NFIL3
ZNF554
ZNF417
ZNF362
RBM6
CUL3
ZNF460
ZNF358
ZBTB9
ZNF780A
E2F8
SCAPER
LASS6
PRMT3
RBM5
MBNL2
RAPGEF3
EP400
TRIM32
SSB
SF3A3
LARP1
MYST4
EIF2C2
AKT3
MECP2
AKT1
POU5F1
TNFSF12
SF1
LIN28
LIN28B
TLX3
HIC1
EBF
DR1
DMRT3
TGIF
BCR
BMP2
FOXJ1
CHX10
BMP6
TLX1
STRA13
IK
hsa-let-7a
hsa-let-7b
hsa-let-7c
hsa-let-7d
hsa-let-7e
hsa-let-7f
hsa-let-7g
hsa-let-7i
hsa-miR-1
hsa-miR-100
hsa-miR-101
hsa-miR-105
hsa-miR-106a
hsa-miR-106b
hsa-miR-107
hsa-miR-10a
hsa-miR-10b
hsa-miR-122
hsa-miR-124
hsa-miR-125a-5p
hsa-miR-125b
hsa-miR-126
hsa-miR-127-3p
hsa-miR-129-5p
hsa-miR-130a
hsa-miR-130b
hsa-miR-132
hsa-miR-133a
hsa-miR-133b
hsa-miR-134
hsa-miR-135a
hsa-miR-135b
hsa-miR-137
hsa-miR-138
hsa-miR-140-5p
hsa-miR-141
hsa-miR-143
hsa-miR-144
hsa-miR-145
hsa-miR-146a
hsa-miR-146b-5p
hsa-miR-148a
hsa-miR-148b
hsa-miR-149*
hsa-miR-150
hsa-miR-151-5p
hsa-miR-152
hsa-miR-153
hsa-miR-155
hsa-miR-15a
hsa-miR-15b
hsa-miR-16
hsa-miR-16-1*
hsa-miR-17
hsa-miR-181a
hsa-miR-181b
hsa-miR-181c
hsa-miR-181d
hsa-miR-182
hsa-miR-183
hsa-miR-184
hsa-miR-185
hsa-miR-186
hsa-miR-18a
hsa-miR-18b
hsa-miR-191
hsa-miR-192
hsa-miR-193a-3p
hsa-miR-193a-5p
hsa-miR-193b
hsa-miR-195
hsa-miR-196a
hsa-miR-196b
hsa-miR-197
hsa-miR-198
hsa-miR-199a-3p
hsa-miR-199a-5p
hsa-miR-199b-3p
hsa-miR-199b-5p
hsa-miR-19a
hsa-miR-19b
hsa-miR-200a
hsa-miR-200b
hsa-miR-200c
hsa-miR-203
hsa-miR-204
hsa-miR-205
hsa-miR-206
hsa-miR-208b
hsa-miR-20a
hsa-miR-20b
hsa-miR-21
hsa-miR-210
hsa-miR-212
hsa-miR-214
hsa-miR-215
hsa-miR-216a
hsa-miR-217
hsa-miR-218
hsa-miR-219-5p
hsa-miR-22
hsa-miR-221
hsa-miR-222
hsa-miR-223
hsa-miR-224
hsa-miR-23a
hsa-miR-23b
hsa-miR-24
hsa-miR-25
hsa-miR-26a
hsa-miR-26b
hsa-miR-27a
hsa-miR-27b
hsa-miR-28-5p
hsa-miR-296-5p
hsa-miR-298
hsa-miR-299-5p
hsa-miR-29a
hsa-miR-29b
hsa-miR-29c
hsa-miR-301a
hsa-miR-302a
hsa-miR-302b
hsa-miR-302c
hsa-miR-302d
hsa-miR-30a
hsa-miR-30c
hsa-miR-30d
hsa-miR-30e
hsa-miR-31
hsa-miR-32
hsa-miR-324-3p
hsa-miR-324-5p
hsa-miR-326
hsa-miR-328
hsa-miR-330-3p
hsa-miR-335
hsa-miR-338-3p
hsa-miR-33a
hsa-miR-33b
hsa-miR-340
hsa-miR-345
hsa-miR-346
hsa-miR-34a
hsa-miR-34b
hsa-miR-34b*
hsa-miR-34c-5p
hsa-miR-361-5p
hsa-miR-363
hsa-miR-370
hsa-miR-372
hsa-miR-373
hsa-miR-374a
hsa-miR-375
hsa-miR-377
hsa-miR-378
hsa-miR-383
hsa-miR-409-3p
hsa-miR-421
hsa-miR-422a
hsa-miR-424
hsa-miR-429
hsa-miR-433
hsa-miR-448
hsa-miR-449a
hsa-miR-450a
hsa-miR-451
hsa-miR-483-3p
hsa-miR-485-3p
hsa-miR-488*
hsa-miR-489
hsa-miR-491-5p
hsa-miR-494
hsa-miR-499-5p
hsa-miR-503
hsa-miR-504
hsa-miR-512-5p
hsa-miR-515-3p
hsa-miR-518a-5p
hsa-miR-519a
hsa-miR-519b-3p
hsa-miR-519c-3p
hsa-miR-519d
hsa-miR-519e
hsa-miR-520a-3p
hsa-miR-520g
hsa-miR-520h
hsa-miR-521
hsa-miR-542-3p
hsa-miR-548d-3p
hsa-miR-559
hsa-miR-562
hsa-miR-569
hsa-miR-572
hsa-miR-582-5p
hsa-miR-584
hsa-miR-590-5p
hsa-miR-603
hsa-miR-605
hsa-miR-625
hsa-miR-630
hsa-miR-631
hsa-miR-632
hsa-miR-639
hsa-miR-650
hsa-miR-654-3p
hsa-miR-657
hsa-miR-659
hsa-miR-661
hsa-miR-7
hsa-miR-802
hsa-miR-885-5p
hsa-miR-9
hsa-miR-92a
hsa-miR-92b
hsa-miR-93
hsa-miR-96
hsa-miR-98
hsa-miR-99a
hsa-miR-99b
hsa-miR-574-5p
hsa-miR-339-5p
hsa-miR-638
hsa-miR-671-5p
hsa-miR-608
hsa-miR-885-3p
hsa-miR-708
hsa-miR-296-3p
hsa-miR-602
hsa-miR-493
hsa-miR-616
hsa-miR-612
hsa-miR-637
hsa-miR-423-5p
hsa-miR-662
hsa-miR-647
hsa-miR-342-5p
hsa-miR-432
hsa-miR-760
hsa-miR-665
hsa-miR-502-5p
hsa-miR-211
hsa-miR-449b
hsa-miR-452
hsa-miR-744
hsa-miR-498
hsa-miR-636
hsa-miR-202
hsa-miR-125a-3p
hsa-miR-484
hsa-miR-615-5p
hsa-miR-595
hsa-miR-412
hsa-miR-505
hsa-miR-658
hsa-miR-770-5p
hsa-miR-139-3p
hsa-miR-139-5p
hsa-miR-541
hsa-miR-877
hsa-miR-431
hsa-miR-330-5p
hsa-miR-146b-3p
hsa-miR-523
hsa-miR-490-3p
hsa-miR-601
hsa-miR-454
hsa-miR-548b-5p
hsa-miR-634
hsa-miR-623
hsa-miR-604
hsa-miR-127-5p
hsa-miR-362-5p
hsa-miR-323-5p
hsa-miR-499-3p
hsa-miR-299-3p
hsa-miR-497
hsa-miR-557
hsa-miR-492
hsa-miR-339-3p
hsa-miR-532-3p
hsa-miR-188-3p
hsa-miR-342-3p
hsa-miR-525-5p
hsa-miR-575
hsa-miR-512-3p
hsa-miR-570
hsa-miR-629
hsa-miR-874
hsa-miR-501-5p
hsa-miR-518d-5p
hsa-miR-526a
hsa-miR-219-1-3p
hsa-miR-635
hsa-miR-329
hsa-miR-147b
hsa-miR-593
hsa-miR-875-3p
hsa-miR-564
hsa-miR-519b-5p
hsa-miR-519c-5p
hsa-miR-654-5p
hsa-miR-520d-3p
hsa-miR-571
hsa-miR-520f
hsa-miR-379
hsa-miR-381
hsa-miR-516b
hsa-miR-628-3p
hsa-miR-609
hsa-miR-485-5p
hsa-miR-483-5p
hsa-miR-149
hsa-miR-611
hsa-miR-490-5p
hsa-miR-300
hsa-miR-578
hsa-miR-532-5p
hsa-miR-301b
hsa-miR-646
hsa-miR-527
hsa-miR-645
hsa-miR-511
hsa-miR-515-5p
hsa-miR-648
hsa-miR-619
hsa-miR-596
hsa-miR-450b-3p
hsa-miR-518a-3p
hsa-miR-455-3p
hsa-miR-219-2-3p
hsa-miR-526b
hsa-miR-371-5p
hsa-miR-520a-5p
hsa-miR-552
hsa-miR-95
hsa-miR-548c-5p
hsa-miR-644
hsa-miR-382
hsa-miR-567
hsa-miR-367
hsa-miR-190b
hsa-miR-409-5p
hsa-miR-613
hsa-miR-151-3p
hsa-miR-338-5p
hsa-miR-516a-5p
hsa-miR-587
hsa-miR-455-5p
hsa-miR-518d-3p
hsa-miR-188-5p
hsa-miR-588
hsa-miR-524-5p
hsa-miR-621
hsa-miR-554
hsa-miR-539
hsa-miR-361-3p
hsa-miR-643
hsa-miR-573
hsa-miR-591
hsa-miR-652
hsa-miR-28-3p
hsa-miR-583
hsa-miR-142-3p
hsa-miR-600
hsa-miR-640
hsa-miR-545
hsa-miR-589
hsa-miR-548d-5p
hsa-miR-136
hsa-miR-558
hsa-miR-620
hsa-miR-555
hsa-miR-495
hsa-miR-194
hsa-miR-579
hsa-miR-376b
hsa-miR-758
hsa-miR-520d-5p
hsa-miR-518c
hsa-miR-548b-3p
hsa-miR-641
hsa-miR-487a
hsa-miR-520e
hsa-miR-331-5p
hsa-miR-627
hsa-miR-331-3p
hsa-miR-376a
hsa-miR-450b-5p
hsa-miR-628-5p
hsa-miR-548a-3p
hsa-miR-140-3p
hsa-miR-585
hsa-miR-617
hsa-miR-34c-3p
hsa-miR-410
hsa-miR-606
hsa-miR-574-3p
hsa-miR-501-3p
hsa-miR-337-5p
hsa-miR-597
hsa-miR-653
hsa-miR-216b
hsa-miR-496
hsa-miR-369-5p
hsa-miR-30b
hsa-miR-626
hsa-miR-190
hsa-miR-518f
hsa-miR-516a-3p
hsa-miR-580
hsa-miR-624
hsa-miR-129-3p
hsa-miR-362-3p
hsa-miR-380
hsa-miR-875-5p
hsa-miR-491-3p
hsa-miR-142-5p
hsa-miR-154
hsa-miR-518b
hsa-miR-502-3p
hsa-miR-524-3p
hsa-miR-522
hsa-miR-548a-5p
hsa-miR-582-3p
hsa-miR-556-5p
hsa-miR-488
hsa-miR-553
hsa-miR-660
hsa-miR-543
hsa-miR-525-3p
hsa-miR-576-3p
hsa-miR-590-3p
hsa-miR-337-3p
hsa-miR-187
hsa-miR-577
hsa-miR-592
hsa-miR-586
hsa-miR-425
hsa-miR-649
hsa-miR-576-5p
hsa-miR-563
hsa-miR-544
hsa-miR-374b
hsa-miR-518e
hsa-miR-551b
hsa-miR-618
hsa-miR-581
hsa-miR-323-3p
hsa-miR-556-3p
hsa-miR-411
hsa-miR-607
hsa-miR-615-3p
hsa-miR-365
hsa-miR-655
hsa-miR-568
hsa-miR-671-3p
hsa-miR-487b
hsa-miR-517c
hsa-miR-369-3p
hsa-miR-371-3p
hsa-miR-561
hsa-miR-889
hsa-miR-302f
hsa-miR-598
hsa-miR-551a
hsa-miR-633
hsa-miR-656
hsa-miR-548c-3p
count .... 2
ZNF136
ZNF430

## Sheet: SCCs of breast cancer DSCS
count .... 27
EGFR
KLF5
MIR-106A
MIR-106B
MIR-130B
MIR-141
MIR-145
MIR-149
MIR-181B
MIR-195
MIR-19A
MIR-19B
MIR-20A
MIR-21
MIR-211
MIR-224
MIR-34A
MIR-34B
MIR-34B*
MIR-378
MIR-497
MIR-7
MIR-93
MYC
POU3F2
SRF
STAT3

## Sheet: SCCs of colorectal cancer DSCS
count .... 7
ETS1
MIR-125A-5P
MIR-125B
MIR-155
MIR-206
MIR-34C-5P
MYB
